# Supplementary material
Source: PubMed Central journal article supplement (PMC9012213)
Supplement: NIHMS1654584-supplement-SM.pdf [file NIHMS1654584-supplement-SM.pdf]

# THE LANCET

## Haematology

### Supplementary appendix

This appendix formed part of the original submission and has been peer reviewed. We post it as supplied by the authors.

Supplement to: Garcia-Manero G, Roboz G, Walsh K, et al. Guadecitabine (SGI-110) in patients with intermediate or high-risk myelodysplastic syndromes: phase 2 results from a multicentre, open-label, randomised, phase 1/2 trial. *Lancet Haematol* 2019; published online May 3. [http://dx.doi.org/10.1016/S2352-3026\(19\)30029-8](http://dx.doi.org/10.1016/S2352-3026(19)30029-8).

## Supplementary Appendix

| Centre #                        | Principal investigator                                                                              | Study centre                                                            | Patients enrolled (N=105), n | Patients treated (N=102), n |
|---------------------------------|-----------------------------------------------------------------------------------------------------|-------------------------------------------------------------------------|------------------------------|-----------------------------|
| 3005                            | Hagop Kantarjian, MD (replaced Jean-Pierre J Issa, MD, 1 Sept 2011)<br>Guillermo Garcia-Manero, MD* | The University of Texas MD Anderson Cancer Center, Houston, USA         | 31                           | 31                          |
| 3001                            | Gail Roboz, MD                                                                                      | New York-Presbyterian/Weill Cornell Medical Center, New York, NY, USA   | 16                           | 16                          |
| 3014                            | Katherine Walsh, MD (replaced William Blum, MD, 27 April 2013)                                      | The Ohio State University, Columbus, OH, USA                            | 11                           | 10                          |
| 3035                            | Jesus Berdeja, MD<br>(replaced Michael R Savona, MD, 4 Feb 2014)                                    | Sarah Cannon, Nashville, TN, USA                                        | 9                            | 9                           |
| 3036                            | Patricia Kropf, MD                                                                                  | Fox Chase Cancer Center, Philadelphia, PA, USA                          | 8                            | 8                           |
| 3007                            | Casey O'Connell, MD                                                                                 | Keck School of Medicine of USC, Los Angeles, CA, USA                    | 8                            | 7                           |
| 3008                            | Raoul Tibes, MD, PhD                                                                                | Mayo Clinic, Scottsdale, AZ, USA                                        | 6                            | 5                           |
| 3035                            | Scott Lunin, MD (replaced Thomas Ervin, MD, 17 Jan 2014)                                            | Florida Cancer Specialists & Research Institute, Fort Myers, FL, USA    | 5                            | 5                           |
| 3039                            | Todd Rosenblat, MD                                                                                  | Columbia University Irving Medical Center, New York                     | 3                            | 3                           |
| 3027                            | Karen Yee, MD                                                                                       | Princess Margaret Cancer Centre, Toronto, Ontario, Canada               | 3                            | 3                           |
| 3032                            | Wendy Stock, MD                                                                                     | The University of Chicago Medicine Comprehensive Cancer Center, IL, USA | 2                            | 2                           |
| 3026                            | Elizabeth Griffiths, MD                                                                             | Roswell Park Comprehensive Cancer Center, Buffalo, NY                   | 1                            | 1                           |
| 3038                            | Joseph Mace, MD                                                                                     | Florida Cancer Specialists & Research Institute, St Petersburg, FL      | 1                            | 1                           |
| 3040                            | Nikolai Podoltsev, MD                                                                               | Yale School of Medicine, New Haven, CT, USA                             | 1                            | 1                           |
| <b>Total no. of centres: 14</b> |                                                                                                     |                                                                         |                              |                             |

Enrolled = signed informed consent form and not screen failure; Treated = enrolled and received  $\geq 1$  dose. \*Coordinating investigator; Dr Garcia-Manero was subinvestigator under Dr Kantarjian for overall study, but acted as coordinating investigator for MDS portion of study and CSR (SGI-110-01-D).

### *Appendix Table A1: Principal investigators and study centres*

Appendix Figure A1. Mean long interspersed nuclear element-1 (LINE-1) demethylation by guadecitabine dose group.

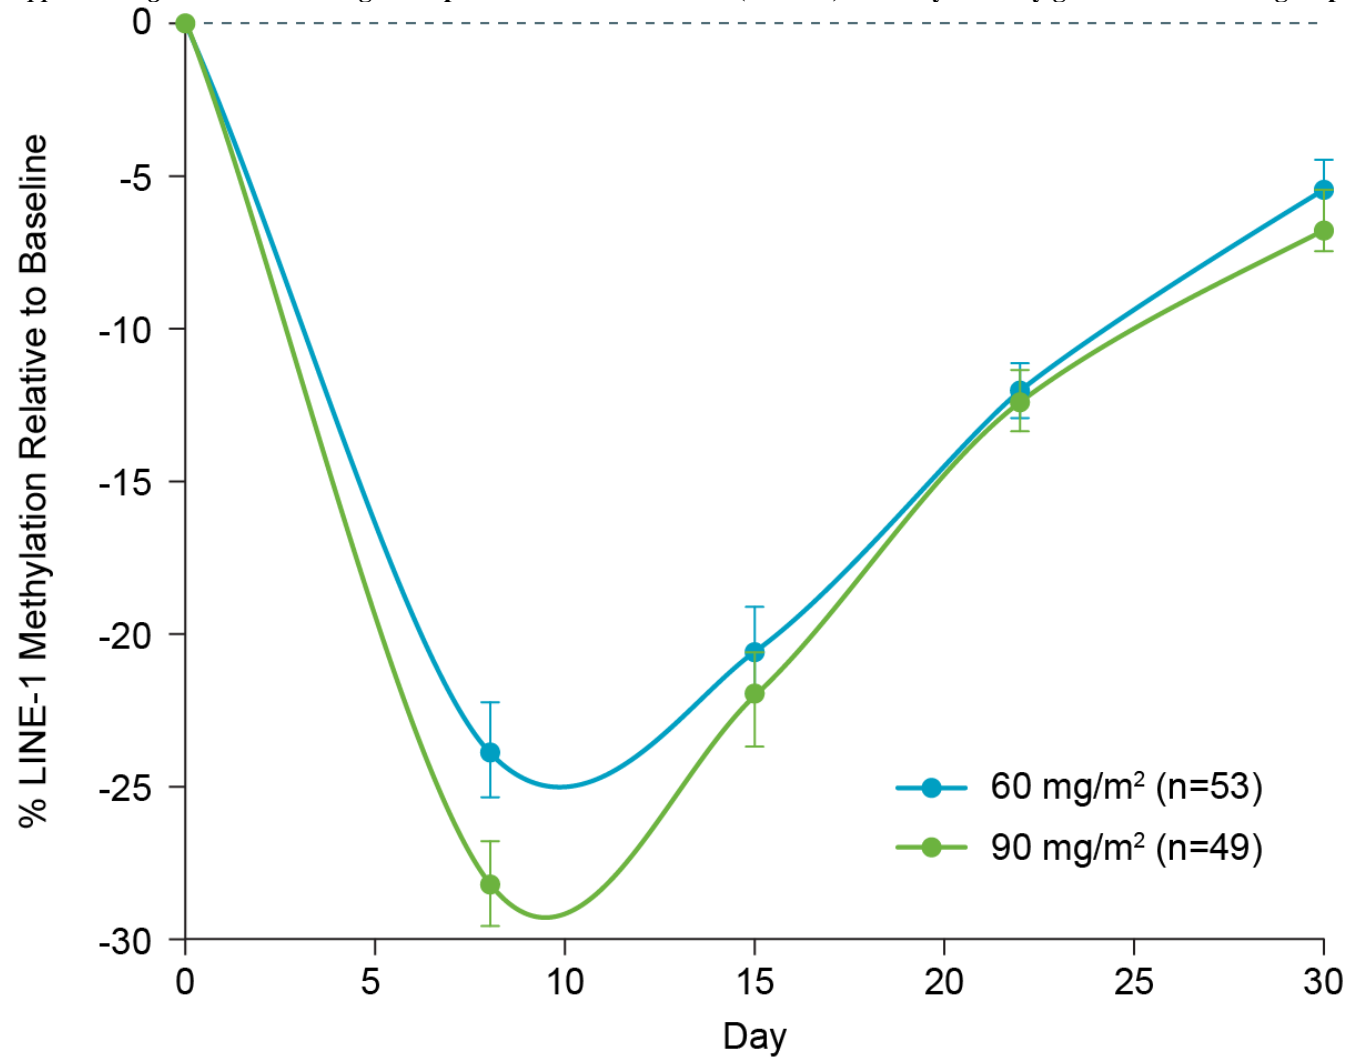

|                    | Overall response rate          |                                |                 |                                |                                |                 |                 |
|--------------------|--------------------------------|--------------------------------|-----------------|--------------------------------|--------------------------------|-----------------|-----------------|
|                    | Relapsed/refractory MDS        |                                |                 | Treatment-naïve MDS            |                                |                 |                 |
|                    | 60 mg/m <sup>2</sup><br>(n=23) | 90 mg/m <sup>2</sup><br>(n=23) | Total<br>(n=46) | 60 mg/m <sup>2</sup><br>(n=26) | 90 mg/m <sup>2</sup><br>(n=21) | Total<br>(n=47) | Total<br>(n=93) |
| DNMT3A negative    | 6/20 (30)                      | 9/18 (50)                      | 15/38 (39)      | 10/20 (50)                     | 10/18 (56)                     | 20/38 (53)      | 35/76 (46)      |
| DNMT3A positive *† | 1/3 (33)                       | 3/5 (60)                       | 4/8 (50)        | 3/6 (50)                       | 2/3 (67)                       | 5/9 (56)        | 9/17 (53)       |
| TET2 negative      | 4/15 (27)                      | 11/21 (52)                     | 15/36 (42)      | 9/18 (50)                      | 11/19 (58)                     | 20/37 (54)      | 35/73 (48)      |
| TET2 positive*†    | 3/8 (38)                       | 1/2 (50)                       | 4/10 (40)       | 4/8 (50)                       | 1/2 (50)                       | 5/10 (50)       | 9/20 (45)       |
| TP53 negative      | 7/19 (37)                      | 10/17 (59)                     | 17/36 (47)      | 13/25 (52)                     | 8/16 (50)                      | 21/41 (51)      | 38/77 (49)      |
| TP53 positive*     | 0/4 (0)                        | 2/6 (33)                       | 2/10 (20)       | 0/1 (0)                        | 4/5 (80)                       | 4/6 (67)        | 6/16 (38)       |

Data expressed as n/N (%). “Positive” means mutation was present; “negative” means mutation was absent. Nine patients without baseline gene mutation data were excluded. MDS=myelodysplastic syndrome. DNMT3A=DNA methyltransferase 3 $\alpha$ . TET2=tet methylcytosine dioxygenase 2. TP53=tumour protein P53.CR=complete response. HI-N= haematologic improvement-neutrophil. \*1 relapsed/refractory patient was positive for DNMT3A and TET2, and a nonresponder. †1 treatment-naïve patient was positive for DNMT3A and TP53 (and had a complete response) and another treatment-naïve patient was positive for DNMT3A and TET2 (and had responses of haematologic improvement and haematologic improvement in neutrophils).

**Appendix Table A2: Overall response by gene mutation status in myelodysplastic syndrome by disease cohort**

|                  | Guadecitabine dose level       |                                | Disease cohort            |                               | All patients<br>(n=102) |
|------------------|--------------------------------|--------------------------------|---------------------------|-------------------------------|-------------------------|
|                  | 60 mg/m <sup>2</sup><br>(n=53) | 90 mg/m <sup>2</sup><br>(n=49) | Treatment naïve<br>(n=49) | Relapsed/refractory<br>(n=53) |                         |
| 30-day mortality | 0                              | 1 (2)                          | 0                         | 1 (2)                         | 1 (1)                   |
| 60-day mortality | 2 (4)                          | 2 (4)                          | 3 (6)                     | 1 (2)                         | 4 (4)                   |
| 90-day mortality | 3 (6)                          | 6 (12)                         | 4 (8)                     | 5 (10)                        | 9 (9)                   |

Data expressed as n (%) of patients.

***Appendix Table A3: All-cause mortality***
